# Supplementary material
Source: MDPI journal article supplement (https://www.mdpi.com/2073-4352/11/12/1445)
Supplement: s1 [file s1]

# Physical Properties Investigations of Ternary-Layered Carbides $M_2PbC$ ( $M = Ti, Zr$ and $Hf$ ): First-Principles Calculations

Tahani A. Alrebdi <sup>1,\*</sup>, Mohammed Benali Kanoun <sup>2</sup> and Souraya Goumri-Said <sup>3,\*</sup>

<sup>1</sup> Department of Physics, College of Science, Princess Nourah Bint Abdulrahman University, P.O. Box 84428, Riyadh 11671, Saudi Arabia

<sup>2</sup> Department of Physics, College of Science, King Faisal University, P.O. Box 400, Al-Ahsa 31982, Saudi Arabia; mkanoun@kfu.edu.sa

<sup>3</sup> Department of Physics, College of Science, Alfaisal University, P.O. Box 50927, Riyadh 11533, Saudi Arabia

\* Correspondence: taalrebdi@pnu.edu.sa (T.A.A.); sosaid@alfaisal.edu (S.G.-S.)

**Table S1.** The equilibrium lattice parameters  $a$  and  $c$ , volume  $V$ , and relaxed atomic parameter  $Z_M$  and the formation energy ( $\Delta E_f$ ) for  $M_2PbC$  ( $M= Ti, Zr, Hf$ ) at various pressure conditions.

|                     | Pressure<br>(GPa) | $a$ (Å) | $c$ (Å) | $c/a$ | $V$ (Å <sup>3</sup> ) | $Z_M$  | $\Delta E_f$ (eV) |
|---------------------|-------------------|---------|---------|-------|-----------------------|--------|-------------------|
| Ti <sub>2</sub> PbC | 0                 | 3.224   | 13.926  |       |                       | 0.0776 | -2.4              |
|                     | 10                | 3.159   | 13.574  | 4.297 | 117.28                | 0.0795 | -2.354            |
|                     | 20                | 3.109   | 13.332  | 4.288 | 111.61                | 0.0807 | -2.076            |
|                     | 30                | 3.064   | 13.147  | 4.291 | 106.90                | 0.0817 | -1.711            |
|                     | 40                | 3.026   | 12.992  | 4.294 | 103.02                | 0.0824 | -1.289            |
|                     | 50                | 2.992   | 12.867  | 4.300 | 99.73                 | 0.0830 | -0.828            |
| Zr <sub>2</sub> PbC | 0                 | 3.413   | 14.868  | 4.356 |                       |        |                   |
|                     | 10                | 3.334   | 14.553  | 4.365 | 150.02                | 0.0813 | -2.940            |
|                     | 20                | 3.271   | 14.317  | 4.377 | 140.09                | 0.9161 | -2.783            |
|                     | 30                | 3.216   | 14.165  | 4.405 | 132.69                | 0.9147 | -2.442            |
|                     | 40                | 3.167   | 14.053  | 4.437 | 126.89                | 0.9136 | -1.994            |
|                     | 50                | 3.124   | 13.960  | 4.469 | 122.07                | 0.9129 | -1.472            |
| Hf <sub>2</sub> PbC | 0                 | 3.386   | 14.584  | 4.307 | 144.80                | 0.0810 | -2.704            |
|                     | 10                | 3.315   | 14.265  | 4.303 | 135.80                | 0.0833 | -2.56             |
|                     | 20                | 3.254   | 14.074  | 4.325 | 129.05                | 0.0846 | -2.248            |
|                     | 30                | 3.203   | 13.916  | 4.345 | 123.66                | 0.0856 | -1.831            |
|                     | 40                | 3.159   | 13.798  | 4.368 | 119.20                | 0.0864 | -1.348            |
|                     | 50                | 3.116   | 13.718  | 4.402 | 115.37                | 0.0871 | -0.806            |

**Table S2.** The calculated elastic constants,  $C_{ij}$  (in GPa), bulk moduli ( $B$ , in GPa), shear moduli ( $G$ , in GPa), Young's moduli ( $Y$ , in GPa), and Poisson's ratio ( $\nu$ ) for Ti<sub>2</sub>PbC, Zr<sub>2</sub>PbC and Hf<sub>2</sub>PbC at various pressure conditions.

|                     |    | $C_{11}$ | $C_{33}$ | $C_{44}$ | $C_{12}$ | $C_{13}$ | $C_{66}$ | $B$   | $G$   | $Y$   |       | $\nu$ |
|---------------------|----|----------|----------|----------|----------|----------|----------|-------|-------|-------|-------|-------|
| Ti <sub>2</sub> PbC | 0  | 244.4    | 228.2    | 68.5     | 100.2    | 42.4     | 72.1     | 119.8 | 76.2  | 188.6 | 0.707 | 0.238 |
|                     | 10 | 310.1    | 317.2    | 105.7    | 113.8    | 82.3     | 98.2     | 165.9 | 105.5 | 261.1 | 0.914 | 0.238 |
|                     | 20 | 377.2    | 394.5    | 138.7    | 133.1    | 111.1    | 122.1    | 206.9 | 132.4 | 327.4 | 1.020 | 0.236 |
|                     | 30 | 438.2    | 457.2    | 169.4    | 150.7    | 136.5    | 143.7    | 242.3 | 156.7 | 386.7 | 1.089 | 0.234 |
|                     | 40 | 495.9    | 524.6    | 200.2    | 168.5    | 163.5    | 163.7    | 278.5 | 180.1 | 444.5 | 1.155 | 0.234 |
|                     | 50 | 572.21   | 609.8    | 228.2    | 204.3    | 165.6    | 183.9    | 313.9 | 208.2 | 511.5 | 1.073 | 0.228 |
| Zr <sub>2</sub> PbC | 0  | 220.11   | 219.9    | 69.8     | 68.5     | 62.9     | 76.2     | 116.3 | 74.1  | 183.4 | 0.889 | 0.237 |

|                     |    |        |       |       |       |       |       |       |       |       |       |       |
|---------------------|----|--------|-------|-------|-------|-------|-------|-------|-------|-------|-------|-------|
|                     | 10 | 287.11 | 298.4 | 105.7 | 82.3  | 98.4  | 102.7 | 158.5 | 102.4 | 252.8 | 1.088 | 0.234 |
|                     | 20 | 347.1  | 367.6 | 136.8 | 94.9  | 129.2 | 126.6 | 195.8 | 126.8 | 312.9 | 1.199 | 0.234 |
|                     | 30 | 421.8  | 428.8 | 157.5 | 122.8 | 140.9 | 161.4 | 231.5 | 152.7 | 375.5 | 1.106 | 0.230 |
|                     | 40 | 465.4  | 510.1 | 195.5 | 130.8 | 194.0 | 165.8 | 273.8 | 171.1 | 424.8 | 1.331 | 0.241 |
|                     | 50 | 507.1  | 537.1 | 192.9 | 147.2 | 201.1 | 182.2 | 293.6 | 179.6 | 447.5 | 1.202 | 0.246 |
| Hf <sub>2</sub> PbC | 0  | 286.8  | 263.2 | 88.1  | 65.4  | 77.4  | 110.7 | 141.6 | 98.1  | 239.1 | 0.892 | 0.219 |
|                     | 10 | 357.0  | 336.1 | 127.8 | 88.2  | 107.1 | 134.4 | 183.8 | 127.5 | 310.7 | 1.067 | 0.219 |
|                     | 20 | 420.0  | 407.3 | 162.1 | 111.8 | 129.9 | 154.1 | 221.4 | 153.7 | 374.5 | 1.143 | 0.218 |
|                     | 30 | 473.0  | 458.4 | 181.6 | 143.5 | 149.4 | 174.3 | 254.1 | 171.0 | 419.0 | 1.148 | 0.225 |
|                     | 40 | 500.3  | 512.2 | 207.8 | 142.9 | 181.2 | 178.7 | 280.1 | 184.8 | 454.5 | 1.279 | 0.230 |
|                     | 50 | 542.8  | 561.4 | 232.7 | 155.9 | 202.1 | 193.6 | 307.1 | 202.6 | 498.2 | 1.323 | 0.230 |

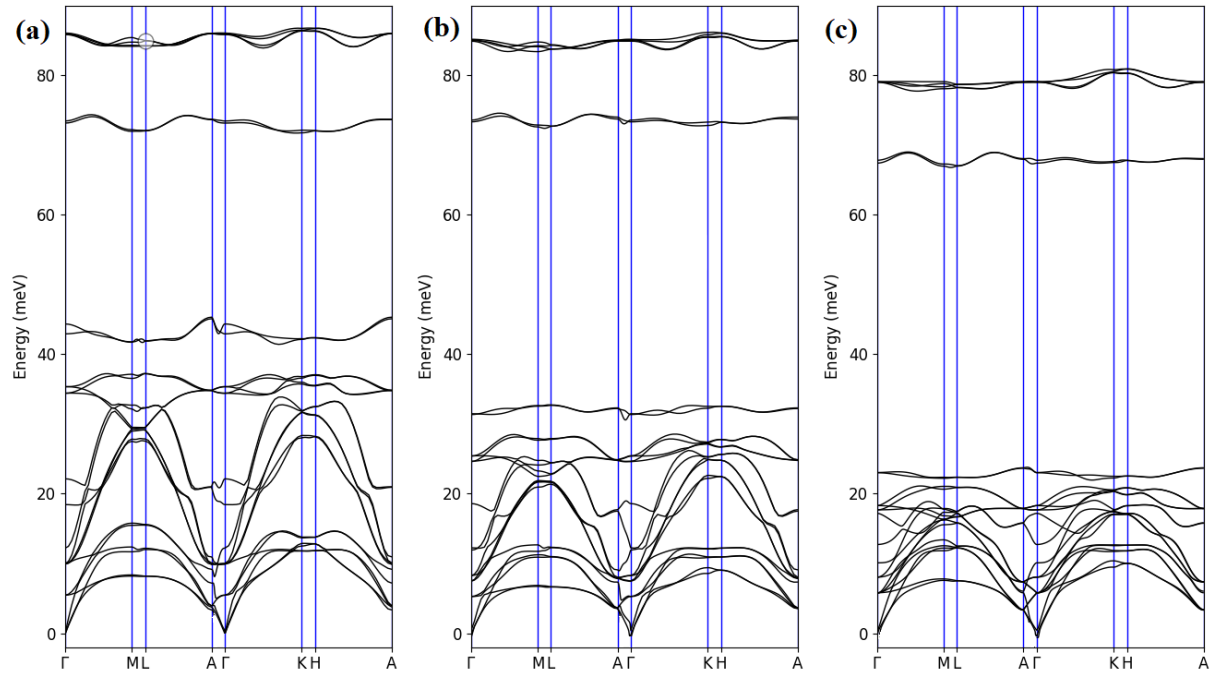

Figure S1. Phonon band dispersion curves of the M<sub>2</sub>PbC MAX phase (M =Ti, Zr, Hf),

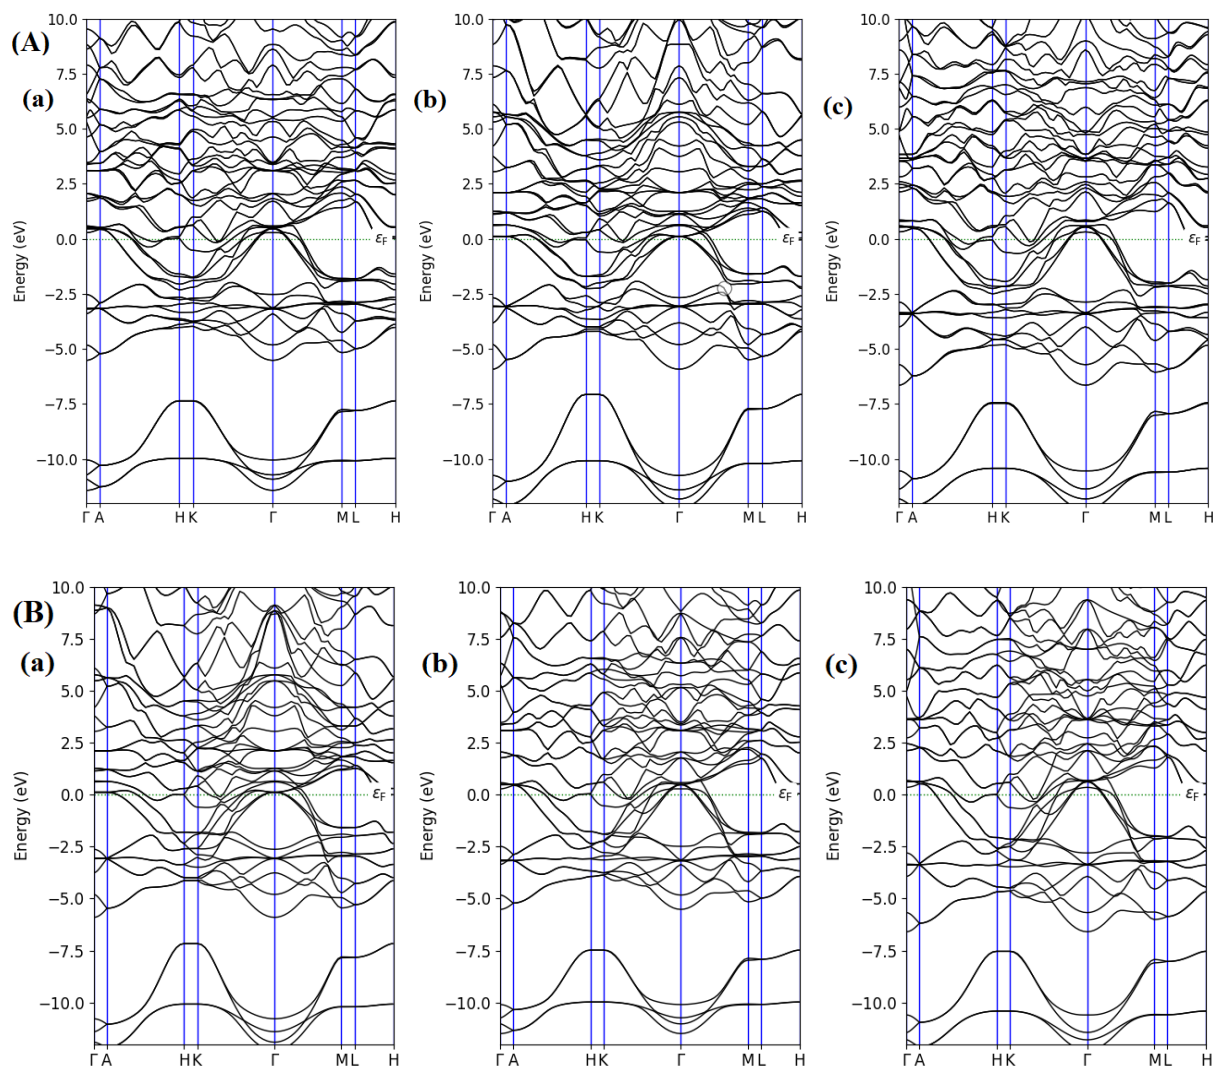

Figure S2. Electronic band structure of (a)  $\text{Ti}_2\text{PbC}$ , (b)  $\text{Zr}_2\text{PbC}$ , and (c)  $\text{Hf}_2\text{SnC}$  (A) with and (B) without SOC contribution
